# Supplementary material for: Inflammation and nutrition-based biomarkers in the prognosis of oesophageal cancer: a systematic review and meta-analysis
Source: HighWire-hosted journal article supplement (doi:10.1136/bmjopen-2020-048324), 2021-09-01
Supplement: bmjopen-2020-048324supp003_data_supplement.pdf [file bmjopen-2020-048324supp003_data_supplement.pdf]

**Table 1. Subgroup analysis and meta analysis of 8 indicators in OS, CSS, and DFS.**

|                | OS |                         |                              |                                       | CSS           |   |                      |                              | DFS                                   |               |   |                      |                              |                                       |               |
|----------------|----|-------------------------|------------------------------|---------------------------------------|---------------|---|----------------------|------------------------------|---------------------------------------|---------------|---|----------------------|------------------------------|---------------------------------------|---------------|
|                | N  | HR(95% CI), <i>P</i>    | I <sup>2</sup> (%), <i>P</i> | Begg's <i>P</i> ,<br>Egger's <i>P</i> | <i>P</i> -reg | N | HR(95% CI), <i>P</i> | I <sup>2</sup> (%), <i>P</i> | Begg's <i>P</i> ,<br>Egger's <i>P</i> | <i>P</i> -reg | N | HR(95% CI), <i>P</i> | I <sup>2</sup> (%), <i>P</i> | Begg's <i>P</i> ,<br>Egger's <i>P</i> | <i>P</i> -reg |
| <b>PNI</b>     |    |                         |                              |                                       |               |   |                      |                              |                                       |               |   |                      |                              |                                       |               |
| Overall        | 11 | 1.51(1.36-1.68), <0.001 | 45.8, 0.048                  | 0.036, 0.188                          |               |   |                      |                              |                                       |               |   |                      |                              |                                       |               |
| Country        |    |                         |                              |                                       |               |   |                      |                              |                                       |               |   |                      |                              |                                       |               |
| China          | 4  | 1.45(1.27-1.64), <0.001 | 36.9, 0.190                  | 0.497, 0.092                          | 0.184         |   |                      |                              |                                       |               |   |                      |                              |                                       |               |
| Non-China      | 7  | 1.82(1.38-2.40), <0.001 | 51.4, 0.054                  | 0.099, 0.006                          |               |   |                      |                              |                                       |               |   |                      |                              |                                       |               |
| Sample size    |    |                         |                              |                                       |               |   |                      |                              |                                       |               |   |                      |                              |                                       |               |
| <255           | 7  | 1.69(1.19-2.40), 0.003  | 66.8, 0.006                  | 0.099, 0.058                          | 0.797         |   |                      |                              |                                       |               |   |                      |                              |                                       |               |
| ≥255           | 4  | 1.52(1.34-1.72), <0.001 | 0.0, 0.949                   | 0.174, 0.052                          |               |   |                      |                              |                                       |               |   |                      |                              |                                       |               |
| Cut-off value  |    |                         |                              |                                       |               |   |                      |                              |                                       |               |   |                      |                              |                                       |               |
| <46            | 5  | 1.68(1.13-2.50), 0.010  | 59.5, 0.043                  | 0.050, 0.432                          | 0.774         |   |                      |                              |                                       |               |   |                      |                              |                                       |               |
| ≥46            | 6  | 1.49(1.33-1.67), <0.001 | 39.9, 0.139                  | 0.348, 0.288                          |               |   |                      |                              |                                       |               |   |                      |                              |                                       |               |
| Treatment      |    |                         |                              |                                       |               |   |                      |                              |                                       |               |   |                      |                              |                                       |               |
| Surgery        | 7  | 1.46(1.20-1.78), <0.001 | 54.4, 0.041                  | 0.752, 0.293                          | Ref           |   |                      |                              |                                       |               |   |                      |                              |                                       |               |
| Mixed          | 3  | 2.18(1.52-3.11), <0.001 | 0.0, 0.649                   | 0.602, 0.448                          | 0.139         |   |                      |                              |                                       |               |   |                      |                              |                                       |               |
| NR             | 1  | 1.50(1.16-1.93), NR     | NR                           | NR                                    | 0.906         |   |                      |                              |                                       |               |   |                      |                              |                                       |               |
| Pathology      |    |                         |                              |                                       |               |   |                      |                              |                                       |               |   |                      |                              |                                       |               |
| SCC            | 9  | 1.56(1.39-1.76), <0.001 | 41.5, 0.091                  | 0.061, 0.184                          | 0.144         |   |                      |                              |                                       |               |   |                      |                              |                                       |               |
| Mixed          | 1  | 1.67(1.14-2.44), NR     | NR                           | NR                                    | 0.231         |   |                      |                              |                                       |               |   |                      |                              |                                       |               |
| NR             | 1  | 1.09(0.80-1.49), NR     | NR                           | NR                                    | Ref           |   |                      |                              |                                       |               |   |                      |                              |                                       |               |
| Clinical stage |    |                         |                              |                                       |               |   |                      |                              |                                       |               |   |                      |                              |                                       |               |
| 0-III          | 5  | 1.62(1.41-1.86), <0.001 | 32.2, 0.207                  | 0.050, <0.001                         | 0.229         |   |                      |                              |                                       |               |   |                      |                              |                                       |               |
| 0-IV           | 6  | 1.41(1.10-1.80), 0.006  | 52.4, 0.062                  | 0.348, 0.687                          |               |   |                      |                              |                                       |               |   |                      |                              |                                       |               |
| Follow-up      |    |                         |                              |                                       |               |   |                      |                              |                                       |               |   |                      |                              |                                       |               |
| <36            | 4  | 1.46(1.15-1.86), 0.002  | 53.4, 0.092                  | 1.000, 0.523                          | 0.962         |   |                      |                              |                                       |               |   |                      |                              |                                       |               |
| ≥36            | 4  | 1.45(1.23-1.70), <0.001 | 46.1, 0.135                  | 1.000, 0.801                          | Ref           |   |                      |                              |                                       |               |   |                      |                              |                                       |               |
| NR             | 3  | 2.26(1.63-3.14), <0.001 | 0.0, 0.988                   | 0.602, 0.337                          | 0.014         |   |                      |                              |                                       |               |   |                      |                              |                                       |               |
| Age            |    |                         |                              |                                       |               |   |                      |                              |                                       |               |   |                      |                              |                                       |               |
| <63.4          | 4  | 1.45(1.27-1.64), <0.001 | 36.9, 0.190                  | 0.497, 0.092                          | Ref           |   |                      |                              |                                       |               |   |                      |                              |                                       |               |
| ≥63.4          | 6  | 1.77(1.31-2.41), <0.001 | 55.0, 0.049                  | 0.039, 0.016                          | 0.270         |   |                      |                              |                                       |               |   |                      |                              |                                       |               |
| NR             | 1  | 2.21(1.28-3.82), NR     | NR                           | NR                                    | 0.249         |   |                      |                              |                                       |               |   |                      |                              |                                       |               |
| Sex ratio      |    |                         |                              |                                       |               |   |                      |                              |                                       |               |   |                      |                              |                                       |               |

|                       |    |                         |              |              |       |    |                        |             |              |       |    |                         |             |              |       |  |  |
|-----------------------|----|-------------------------|--------------|--------------|-------|----|------------------------|-------------|--------------|-------|----|-------------------------|-------------|--------------|-------|--|--|
| <4.75                 | 5  | 1.46(1.29-1.66), <0.001 | 25.1, 0.254  | 0.624, 0.545 |       |    |                        |             |              |       |    |                         |             |              |       |  |  |
| ≥4.75                 | 6  | 1.84(1.34-2.53), <0.001 | 59.1, 0.032  | 0.091, 0.011 | 0.253 |    |                        |             |              |       |    |                         |             |              |       |  |  |
| <b>NLR</b>            |    |                         |              |              |       |    |                        |             |              |       |    |                         |             |              |       |  |  |
| Overall               | 34 | 1.43(1.30-1.58), <0.001 | 61.7, <0.001 | 0.113, 0.428 |       | 8  | 1.21(1.04-1.41), 0.011 | 43.4, 0.089 | 0.621, 0.695 |       | 7  | 1.39(1.10-1.75), 0.005  | 60.9, 0.018 | 0.453, 0.344 |       |  |  |
| <b>Country</b>        |    |                         |              |              |       |    |                        |             |              |       |    |                         |             |              |       |  |  |
| China                 | 23 | 1.43(1.30-1.57), <0.001 | 51.5, 0.002  | 0.107, 0.399 | 0.883 | 4  | 1.15(0.97-1.36), 0.117 | 38.8, 0.179 | 0.174, 0.971 | 0.436 | 5  | 1.22(1.05-1.42), 0.010  | 0.0, 0.514  | 0.050, 0.062 | 0.018 |  |  |
| Non-China             | 11 | 1.45(1.06-1.98), 0.022  | 75.5, <0.001 | 0.484, 0.513 |       | 4  | 1.42(1.06-1.90), 0.020 | 49.8, 0.113 | 0.497, 0.376 |       | 2  | 2.43(1.69-3.49), <0.001 | 0.0, 0.604  | NR           |       |  |  |
| <b>Sample size</b>    |    |                         |              |              |       |    |                        |             |              |       |    |                         |             |              |       |  |  |
| <297                  | 18 | 1.45(1.19-1.76), <0.001 | 65.6, <0.001 | 0.088, 0.192 | 0.965 | 2  | 0.95(0.59-1.54), 0.848 | 43.6, 0.183 | NR           | 0.395 | 4  | 1.56(0.95-2.58), 0.080  | 78.9, 0.003 | 0.174, 0.316 | 0.553 |  |  |
| ≥297                  | 15 | 1.42(1.27-1.58), <0.001 | 60.2, 0.001  | 0.347, 0.809 | Ref   | 6  | 1.24(1.06-1.45), 0.006 | 47.5, 0.090 | 0.091, 0.138 |       | 3  | 1.29(1.08-1.54), 0.005  | 0.0, 0.799  | 0.117, 0.089 |       |  |  |
| NR                    | 1  | 1.84(1.21-2.83), NR     | NR           | NR           | 0.466 | NR | NR                     | NR          | NR           |       | NR | NR                      | NR          | NR           |       |  |  |
| <b>Cut-off value</b>  |    |                         |              |              |       |    |                        |             |              |       |    |                         |             |              |       |  |  |
| <2.5                  | 16 | 1.38(1.20-1.58), <0.001 | 56.9, 0.003  | 0.072, 0.082 | 0.563 | 3  | 1.43(1.04-1.97), 0.030 | 66.5, 0.051 | 0.602, 0.268 | 0.493 | 4  | 1.34(0.94-1.91), 0.103  | 69.2, 0.021 | 1.000, 0.704 | 0.763 |  |  |
| ≥2.5                  | 18 | 1.48(1.28-1.71), <0.001 | 62.5, <0.001 | 0.733, 0.623 |       | 5  | 1.16(0.98-1.37), 0.084 | 21.9, 0.275 | 0.142, 0.737 |       | 3  | 1.47(1.03-2.11), 0.034  | 61.8, 0.073 | 0.117, 0.377 |       |  |  |
| <b>Treatment</b>      |    |                         |              |              |       |    |                        |             |              |       |    |                         |             |              |       |  |  |
| Surgery               | 24 | 1.32(1.19-1.48), <0.001 | 56.9, <0.001 | 0.215, 0.290 | Ref   | 8  | 1.21(1.04-1.41), 0.010 | 43.4, 0.089 | 0.621, 0.695 |       | 7  | 1.39(1.10-1.75), 0.005  | 60.9, 0.018 | 0.453, 0.344 |       |  |  |
| CRT                   | 3  | 1.79(1.51-2.13), <0.001 | 0.0, 0.704   | 0.602, 0.960 | 0.090 | NR | NR                     | NR          | NR           | NR    | NR | NR                      | NR          | NR           | NR    |  |  |
| Mixed                 | 7  | 1.73(1.51-1.99), <0.001 | 39.3, 0.130  | 0.176, 0.779 | 0.062 | NR | NR                     | NR          | NR           |       | NR | NR                      | NR          | NR           |       |  |  |
| <b>Pathology</b>      |    |                         |              |              |       |    |                        |             |              |       |    |                         |             |              |       |  |  |
| SCC                   | 27 | 1.42(1.28-1.57), <0.001 | 56.0, <0.001 | 0.084, 0.517 | 0.683 | 8  | 1.21(1.04-1.41), 0.011 | 43.4, 0.089 | 0.621, 0.695 |       | 5  | 1.22(1.05-1.42), 0.010  | 0.0, 0.514  | 0.050, 0.062 | 0.018 |  |  |
| Mixed                 | 4  | 1.75(0.84-3.66), 0.137  | 87.9, <0.001 | 1.000, 0.661 | 0.420 | NR | NR                     | NR          | NR           | NR    | 2  | 2.43(1.69-3.49), <0.001 | 0.0, 0.604  | NR           |       |  |  |
| NR                    | 3  | 1.36(1.13-1.65), 0.002  | 0.0, 0.509   | 0.602, 0.452 | Ref   | NR | NR                     | NR          | NR           |       | NR | NR                      | NR          | NR           |       |  |  |
| <b>Clinical stage</b> |    |                         |              |              |       |    |                        |             |              |       |    |                         |             |              |       |  |  |
| 0-III                 | 22 | 1.31(1.22-1.41), <0.001 | 43.0, 0.018  | 0.019, 0.039 | 0.262 | 6  | 1.12(0.96-1.32), 0.159 | 30.4, 0.207 | 0.573, 0.701 | 0.083 | 5  | 1.35(1.15-1.57), <0.001 | 36.4, 0.179 | 0.624, 0.229 | 0.963 |  |  |
| 0-IV                  | 12 | 1.56(1.28-1.89), <0.001 | 71.1, <0.001 | 0.784, 0.600 |       | 2  | 1.80(1.24-2.60), 0.002 | 0.0, 0.907  | 0.317, NR    |       | 2  | 1.40(0.55-3.57), 0.486  | 89.0, 0.003 | 0.317, NR    |       |  |  |
| <b>Follow-up</b>      |    |                         |              |              |       |    |                        |             |              |       |    |                         |             |              |       |  |  |
| <37                   | 12 | 1.60(1.34-1.91), <0.001 | 60.5, 0.003  | 0.493, 0.485 | 0.079 | 2  | 1.80(1.24-2.60), 0.002 | 0.0, 0.907  | 0.317, NR    | 0.105 | 2  | 1.40(0.55-3.57), 0.486  | 89.0, 0.003 | 0.317, NR    | 0.963 |  |  |
| ≥37                   | 10 | 1.26(1.15-1.38), <0.001 | 45.4, 0.058  | 0.531, 0.844 | Ref   | 3  | 1.11(0.73-1.69), 0.623 | 67.1, 0.048 | 0.602, 0.534 | 0.740 | 5  | 1.35(1.15-1.57), <0.001 | 36.4, 0.179 | 0.624, 0.229 |       |  |  |
| NR                    | 12 | 1.45(1.20-1.76), <0.001 | 64.8, 0.001  | 0.217, 0.832 | 0.307 | 3  | 1.06(0.84-1.34), 0.614 | 0.0, 0.712  | 0.117, 0.166 | Ref   | NR | NR                      | NR          | NR           |       |  |  |
| <b>Age</b>            |    |                         |              |              |       |    |                        |             |              |       |    |                         |             |              |       |  |  |
| <61.1                 | 15 | 1.37(1.22-1.53), <0.001 | 53.9, 0.007  | 0.083, 0.446 | Ref   | 3  | 1.28(1.02-1.61), 0.033 | 40.9, 0.184 | 0.602, 0.932 |       | 4  | 1.28(1.09-1.50), 0.003  | 0.0, 0.919  | 0.174, 0.075 | Ref   |  |  |
| ≥61.1                 | 11 | 1.45(1.16-1.82), 0.001  | 70.3, <0.001 | 0.697, 0.636 | 0.706 | NR | NR                     | NR          | NR           | 0.759 | 2  | 1.40(0.55-3.57), 0.486  | 89.0, 0.003 | 0.317, NR    | 0.775 |  |  |
| NR                    | 8  | 1.56(1.16-2.10), 0.003  | 62.9, 0.009  | 0.805, 0.875 | 0.461 | 5  | 1.20(0.88-1.62), 0.246 | 53.4, 0.072 | 1.000, 0.651 |       | 1  | 2.76(1.50-5.03), NR     | NR          | NR           | 0.152 |  |  |
| <b>Sex ratio</b>      |    |                         |              |              |       |    |                        |             |              |       |    |                         |             |              |       |  |  |
| <5.12                 | 17 | 1.38(1.22-1.56), <0.001 | 62.3, <0.001 | 0.510, 0.856 | 0.458 | 7  | 1.14(0.96-1.34), 0.129 | 35.6, 0.157 | 0.453, 0.417 | 0.287 | 6  | 1.30(1.26-1.50), <0.001 | 48.4, 0.085 | 0.573, 0.960 | 0.123 |  |  |

|                |    |                         |              |              |       |   |                     |    |    |  |    |                         |              |              |       |
|----------------|----|-------------------------|--------------|--------------|-------|---|---------------------|----|----|--|----|-------------------------|--------------|--------------|-------|
| ≥5.12          | 17 | 1.52(1.27-1.81), <0.001 | 62.8, <0.001 | 0.021, 0.286 |       | 1 | 1.59(1.13-2.24), NR | NR | NR |  | 1  | 2.76(1.50-5.03), NR     | NR           | NR           |       |
| <b>PLR</b>     |    |                         |              |              |       |   |                     |    |    |  |    |                         |              |              |       |
| Overall        | 19 | 1.26(1.18-1.35), <0.001 | 29.8, 0.108  | 0.054, 0.108 |       |   |                     |    |    |  | 5  | 1.30(1.12-1.51), <0.001 | 33.0, 0.202  | 0.142, 0.472 |       |
| Country        |    |                         |              |              |       |   |                     |    |    |  |    |                         |              |              |       |
| China          | 15 | 1.26(1.17-1.35), <0.001 | 42.1, 0.043  | 0.125, 0.121 |       |   |                     |    |    |  | 5  | 1.30(1.12-1.51), <0.001 | 33.0, 0.202  | 0.142, 0.472 | NR    |
| Non-China      | 4  | 1.40(1.07-1.83), 0.016  | 0.0, 0.854   | 1.000, 0.771 | 0.571 |   |                     |    |    |  | NR | NR                      | NR           | NR           |       |
| Sample size    |    |                         |              |              |       |   |                     |    |    |  |    |                         |              |              |       |
| <303           | 10 | 1.38(1.18-1.62), <0.001 | 25.5, 0.209  | 0.245, 0.157 |       |   |                     |    |    |  | 2  | 0.99(0.71-1.39), 0.958  | 0.0, 0.682   | 0.602, 0.463 |       |
| ≥303           | 9  | 1.24(1.15-1.34), <0.001 | 33.7, 0.148  | 0.297, 0.206 | 0.341 |   |                     |    |    |  | 3  | 1.39(1.18-1.64), <0.001 | 24.5, 0.266  | NR           | 0.174 |
| Cut-off value  |    |                         |              |              |       |   |                     |    |    |  |    |                         |              |              |       |
| <143           | 10 | 1.24(1.14-1.35), <0.001 | 11.7, 0.335  | 0.006, 0.001 |       |   |                     |    |    |  | 3  | 1.39(1.18-1.64), <0.001 | 24.5, 0.266  | NR           |       |
| ≥143           | 9  | 1.33(1.17-1.52), <0.001 | 44.7, 0.071  | 1.000, 0.858 | 0.567 |   |                     |    |    |  | 2  | 0.99(0.71-1.39), 0.958  | 0.0, 0.682   | 0.602, 0.463 | 0.174 |
| Treatment      |    |                         |              |              |       |   |                     |    |    |  |    |                         |              |              |       |
| Surgery        | 15 | 1.24(1.16-1.33), <0.001 | 24.2, 0.186  | 0.458, 0.553 |       |   |                     |    |    |  | 5  | 1.30(1.12-1.51), <0.001 | 33.0, 0.202  | 0.142, 0.472 |       |
| Mixed          | 4  | 1.61(1.26-2.06), <0.001 | 1.6, 0.384   | 0.174, 0.086 | 0.079 |   |                     |    |    |  | NR | NR                      | NR           | NR           | NR    |
| Pathology      |    |                         |              |              |       |   |                     |    |    |  |    |                         |              |              |       |
| SCC            | 17 | 1.27(1.19-1.37), <0.001 | 33.2, 0.091  | 0.070, 0.122 | 0.432 |   |                     |    |    |  | 5  | 1.30(1.12-1.51), <0.001 | 33.0, 0.202  | 0.142, 0.472 |       |
| Mixed          | 1  | 1.55(0.95-2.59), NR     | NR           | NR           | 0.356 |   |                     |    |    |  | NR | NR                      | NR           | NR           | NR    |
| NR             | 1  | 1.12(0.87-1.43), NR     | NR           | NR           | Ref   |   |                     |    |    |  | NR | NR                      | NR           | NR           |       |
| Clinical stage |    |                         |              |              |       |   |                     |    |    |  |    |                         |              |              |       |
| 0-III          | 15 | 1.27(1.18-1.36), <0.001 | 34.7, 0.091  | 0.033, 0.039 |       |   |                     |    |    |  | 4  | 1.34(1.15-1.57), <0.001 | 37.6, 0.187  | 0.497, 0.709 |       |
| 0-IV           | 4  | 1.21(0.94-1.57), 0.139  | 24.5, 0.265  | 0.497, 0.205 | 0.733 |   |                     |    |    |  | 1  | 1.05(0.69-1.60), NR     | NR           | NR           | 0.461 |
| Follow-up      |    |                         |              |              |       |   |                     |    |    |  |    |                         |              |              |       |
| <39            | 4  | 1.17(1.01-1.36), 0.041  | 18.8, 0.296  | 0.497, 0.311 | Ref   |   |                     |    |    |  | 1  | 1.05(0.69-1.60), NR     | NR           | NR           |       |
| ≥39            | 8  | 1.19(1.09-1.30), <0.001 | 0.0, 0.974   | 0.458, 0.520 | 0.855 |   |                     |    |    |  | 4  | 1.34(1.15-1.57), <0.001 | 37.6, 0.187  | 0.497, 0.709 | 0.461 |
| NR             | 7  | 1.71(1.46-2.02), <0.001 | 0.0, 0.682   | 0.293, 0.441 | 0.004 |   |                     |    |    |  | NR | NR                      | NR           | NR           |       |
| Age            |    |                         |              |              |       |   |                     |    |    |  |    |                         |              |              |       |
| <61.2          | 12 | 1.26(1.17-1.35), <0.001 | 41.5, 0.065  | 0.100, 0.097 | Ref   |   |                     |    |    |  | 4  | 1.34(1.15-1.57), <0.001 | 37.6, 0.187  | 0.497, 0.709 |       |
| ≥61.2          | 6  | 1.33(1.10-1.61), 0.003  | 21.9, 0.269  | 0.348, 0.470 | 0.698 |   |                     |    |    |  | 1  | 1.05(0.69-1.60), NR     | NR           | NR           | 0.461 |
| NR             | 1  | 1.27(0.76-2.12), NR     | NR           | NR           | 0.994 |   |                     |    |    |  | NR | NR                      | NR           | NR           |       |
| Sex ratio      |    |                         |              |              |       |   |                     |    |    |  |    |                         |              |              |       |
| <4.55          | 8  | 1.22(1.12-1.33), <0.001 | 0.0, 0.863   | 1.000, 0.810 |       |   |                     |    |    |  | 4  | 1.34(1.15-1.57), <0.001 | 37.6, 0.187  | 0.497, 0.709 |       |
| ≥4.55          | 11 | 1.41(1.17-1.69), <0.001 | 51.4, 0.024  | 0.102, 0.213 | 0.265 |   |                     |    |    |  | 1  | 1.05(0.69-1.60), NR     | NR           | NR           | 0.461 |
| <b>LMR</b>     |    |                         |              |              |       |   |                     |    |    |  |    |                         |              |              |       |
| Overall        | 13 | 1.37(1.14-1.65), 0.001  | 84.9, <0.001 | 0.028, 0.167 |       |   |                     |    |    |  | 6  | 1.08(0.85-1.39), 0.522  | 79.8, <0.001 | 0.573, 0.838 |       |

|                |    |                         |              |              |       |  |    |                         |              |              |       |
|----------------|----|-------------------------|--------------|--------------|-------|--|----|-------------------------|--------------|--------------|-------|
| Country        |    |                         |              |              |       |  |    |                         |              |              |       |
| China          | 12 | 1.35(1.11-1.63), 0.002  | 85.7, <0.001 | 0.028, 0.229 |       |  | 6  | 1.08(0.85-1.39), 0.522  | 79.8, <0.001 | 0.573, 0.838 | NR    |
| Non-China      | 1  | 1.87(1.09-3.23), NR     | NR           | NR           | 0.525 |  | NR | NR                      | NR           | NR           |       |
| Sample size    |    |                         |              |              |       |  |    |                         |              |              |       |
| <280           | 7  | 1.86(1.36-2.55), <0.001 | 75.4, <0.001 | 0.881, 0.609 |       |  | 3  | 1.44(1.19-1.76), <0.001 | 0.0, 0.686   | 0.117, 0.290 | 0.085 |
| ≥280           | 6  | 1.09(0.97-1.22), 0.168  | 54.1, 0.053  | 0.348, 0.357 | 0.006 |  | 3  | 0.81(0.54-1.20), 0.296  | 87.0, <0.001 | 0.117, 0.013 |       |
| Cut-off value  |    |                         |              |              |       |  |    |                         |              |              |       |
| <3.57          | 6  | 1.65(1.11-2.47), 0.014  | 91.1, <0.001 | 0.851, 0.191 |       |  | 4  | 1.18(1.08-1.29), <0.001 | 49.5, 0.115  | 0.042, 0.025 | 0.034 |
| ≥3.57          | 7  | 1.17(0.97-1.42), 0.110  | 71.1, 0.002  | 0.293, 0.627 | 0.174 |  | 2  | 0.65(0.38-1.11), 0.116  | 73.7, 0.051  | NR           |       |
| Treatment      |    |                         |              |              |       |  |    |                         |              |              |       |
| Surgery        | 9  | 1.20(1.02-1.41), 0.033  | 62.2, 0.007  | 0.144, 0.496 | Ref   |  | 4  | 1.00(0.61-1.62), 0.984  | 86.3, <0.001 | 1.000, 0.995 |       |
| CCRT           | 1  | 3.60(2.66-4.88), NR     | NR           | NR           | 0.006 |  | NR | NR                      | NR           | NR           | 0.651 |
| Mixed          | 3  | 1.36(1.01-1.83), 0.045  | 73.1, 0.024  | 0.117, 0.179 | 0.539 |  | 2  | 1.14(1.04-1.25), 0.005  | 12.4, 0.285  | NR           |       |
| Pathology      |    |                         |              |              |       |  |    |                         |              |              |       |
| SCC            | 13 | 1.37(1.14-1.65), 0.001  | 84.9, <0.001 | 0.028, 0.167 |       |  | 6  | 1.08(0.85-1.39), 0.522  | 79.8, <0.001 | 0.573, 0.838 | NR    |
| Mixed          | NR | NR                      | NR           | NR           | NR    |  | NR | NR                      | NR           | NR           |       |
| Clinical stage |    |                         |              |              |       |  |    |                         |              |              |       |
| 0-III          | 11 | 1.46(1.20-1.77), <0.001 | 84.7, <0.001 | 0.010, 0.055 |       |  | 4  | 1.15(0.92-1.45), 0.219  | 73.5, 0.010  | 0.174, 0.779 | 0.484 |
| 0-IV           | 2  | 0.93(0.39-2.21), 0.875  | 90.2, 0.001  | 0.317, NR    | 0.176 |  | 2  | 0.84(0.28-2.54), 0.754  | 92.2, <0.001 | 0.317, NR    |       |
| Follow-up      |    |                         |              |              |       |  |    |                         |              |              |       |
| <39            | 4  | 1.67(0.77-3.65), 0.198  | 94.3, <0.001 | 1.000, 0.505 | 0.429 |  | 2  | 0.89(0.26-3.02), 0.848  | 93.5, <0.001 | 0.317, NR    | Ref   |
| ≥39            | 7  | 1.20(1.09-1.32), <0.001 | 0.0, 0.524   | 0.004, 0.002 | 0.891 |  | 3  | 1.15(0.79-1.66), 0.466  | 78.2, 0.010  | 0.117, 0.295 | 0.661 |
| NR             | 2  | 1.12(1.02-1.23), 0.014  | 0.0, 0.515   | 0.317, NR    | Ref   |  | 1  | 1.12(1.02-1.24), NR     | NR           | NR           | 0.767 |
| Age            |    |                         |              |              |       |  |    |                         |              |              |       |
| <61.5          | 7  | 1.16(1.08-1.24), <0.001 | 12.9, 0.331  | 0.024, 0.044 | Ref   |  | 4  | 1.17(0.92-1.50), 0.208  | 75.0, 0.007  | 0.174, 0.723 | 0.104 |
| ≥61.5          | 4  | 1.59(0.67-3.93), 0.312  | 94.3, <0.001 | 0.497, 0.692 | 0.373 |  | 1  | 0.47(0.28-0.78), NR     | NR           | NR           | Ref   |
| NR             | 2  | 1.46(1.12-1.90), 0.005  | 5.1, 0.305   | 0.317, NR    | 0.544 |  | 1  | 1.33(0.99-1.79), NR     | NR           | NR           | 0.119 |
| Sex ratio      |    |                         |              |              |       |  |    |                         |              |              |       |
| <4.32          | 7  | 1.21(1.10-1.33), <0.001 | 21.5, 0.266  | 0.004, 0.005 |       |  | 3  | 1.15(0.79-1.66), 0.466  | 78.2, 0.010  | 0.117, 0.295 | 0.708 |
| ≥4.32          | 6  | 1.50(0.91-2.46), 0.109  | 93.1, <0.001 | 0.851, 0.462 | 0.575 |  | 3  | 0.99(0.60-1.65), 0.969  | 87.1, <0.001 | 0.602, 0.808 |       |
| <b>SH</b>      |    |                         |              |              |       |  |    |                         |              |              |       |
| Overall        | 7  | 1.46(1.30-1.65), <0.001 | 41.0, 0.118  | 0.099, 0.113 |       |  |    |                         |              |              |       |
| Country        |    |                         |              |              |       |  |    |                         |              |              |       |
| China          | 6  | 1.53(1.27-1.85), <0.001 | 50.5, 0.073  | 0.091, 0.082 |       |  |    |                         |              |              | 0.890 |
| Non-China      | 1  | 1.65(0.74-3.96), NR     | NR           | NR           |       |  |    |                         |              |              |       |

|                |    |                         |             |              |       |   |                         |             |              |       |   |                         |             |              |
|----------------|----|-------------------------|-------------|--------------|-------|---|-------------------------|-------------|--------------|-------|---|-------------------------|-------------|--------------|
| Sample size    |    |                         |             |              |       |   |                         |             |              |       |   |                         |             |              |
| <298           | 3  | 2.31(1.61-3.33), <0.001 | 0.0, 0.655  | 0.602, 0.400 |       |   |                         |             |              |       |   |                         |             |              |
| ≥298           | 4  | 1.38(1.22-1.57), <0.001 | 0.0, 0.481  | 0.497, 0.490 | 0.047 |   |                         |             |              |       |   |                         |             |              |
| Cut-off value  |    |                         |             |              |       |   |                         |             |              |       |   |                         |             |              |
| <410           | 3  | 1.31(1.11-1.54), 0.001  | 0.0, 0.372  | 0.117, 0.052 |       |   |                         |             |              |       |   |                         |             |              |
| ≥410           | 4  | 1.67(1.40-1.99), <0.001 | 30.6, 0.229 | 0.497, 0.595 | 0.140 |   |                         |             |              |       |   |                         |             |              |
| Treatment      |    |                         |             |              |       |   |                         |             |              |       |   |                         |             |              |
| Surgery        | 6  | 1.45(1.28-1.64), <0.001 | 45.0, 0.106 | 0.188, 0.204 |       |   |                         |             |              |       |   |                         |             |              |
| CRT            | 1  | 2.29(0.98-5.30), NR     | NR          | NR           | 0.428 |   |                         |             |              |       |   |                         |             |              |
| Pathology      |    |                         |             |              |       |   |                         |             |              |       |   |                         |             |              |
| SCC            | 6  | 1.53(1.27-1.85), <0.001 | 50.5, 0.073 | 0.091, 0.082 |       |   |                         |             |              |       |   |                         |             |              |
| Mixed          | 1  | 1.65(0.74-3.96), NR     | NR          | NR           | 0.890 |   |                         |             |              |       |   |                         |             |              |
| Clinical stage |    |                         |             |              |       |   |                         |             |              |       |   |                         |             |              |
| 0-III          | 5  | 1.40(1.23-1.59), <0.001 | 0.0, 0.435  | 0.327, 0.181 |       |   |                         |             |              |       |   |                         |             |              |
| 0-IV           | 2  | 2.32(1.55-3.48), <0.001 | 0.0, 0.358  | 0.317, NR    | 0.068 |   |                         |             |              |       |   |                         |             |              |
| Follow-up      |    |                         |             |              |       |   |                         |             |              |       |   |                         |             |              |
| <36            | 1  | 2.29(0.98-5.30), NR     | NR          | NR           | 0.469 |   |                         |             |              |       |   |                         |             |              |
| ≥36            | 4  | 1.54(1.20-1.96), 0.001  | 66.6, 0.029 | 0.174, 0.098 | 0.908 |   |                         |             |              |       |   |                         |             |              |
| NR             | 2  | 1.46(1.08-1.98), 0.013  | 0.0, 0.771  | 0.317, NR    | Ref   |   |                         |             |              |       |   |                         |             |              |
| Age            |    |                         |             |              |       |   |                         |             |              |       |   |                         |             |              |
| <63.0          | 3  | 1.37(1.19-1.58), <0.001 | 16.6, 0.301 | 0.602, 0.607 | Ref   |   |                         |             |              |       |   |                         |             |              |
| ≥63.0          | 2  | 2.32(1.55-3.48), <0.001 | 0.0, 0.358  | 0.317, NR    | 0.084 |   |                         |             |              |       |   |                         |             |              |
| NR             | 2  | 1.53(1.13-2.06), 0.006  | 0.0, 0.319  | 0.317, NR    | 0.580 |   |                         |             |              |       |   |                         |             |              |
| Sex ratio      |    |                         |             |              |       |   |                         |             |              |       |   |                         |             |              |
| <4.55          | 3  | 1.40(1.20-1.64), <0.001 | 46.1, 0.156 | 0.602, 0.475 |       |   |                         |             |              |       |   |                         |             |              |
| ≥4.55          | 4  | 1.55(1.29-1.87), <0.001 | 48.0, 0.123 | 0.174, 0.468 | 0.646 |   |                         |             |              |       |   |                         |             |              |
| <b>GPS</b>     |    |                         |             |              |       |   |                         |             |              |       |   |                         |             |              |
| Overall        | 15 | 2.35(1.99-2.76), <0.001 | 36.5, 0.078 | 0.729, 0.838 |       | 5 | 1.64(1.33-1.94), <0.001 | 45.5, 0.119 | 0.624, 0.905 |       | 5 | 2.44(1.28-4.67), 0.007  | 57.5, 0.052 | 1.000, 0.751 |
| Country        |    |                         |             |              |       |   |                         |             |              |       |   |                         |             |              |
| China          | 4  | 2.23(1.57-3.17), <0.001 | 7.5, 0.356  | 0.497, 0.323 |       | 4 | 1.66(1.48-1.87), <0.001 | 47.4, 0.812 | 0.734, 0.432 | 0.246 | 1 | 2.75(0.37-20.31), NR    | NR          | NR           |
| Non-China      | 11 | 2.38(1.98-2.86), <0.001 | 46.5, 0.044 | 0.484, 0.699 | 0.952 | 1 | 2.53(1.49-4.28), NR     | NR          | NR           |       | 4 | 2.43(1.17-5.06), 0.017  | 68.0, 0.025 | 0.497, 0.781 |
| Sample size    |    |                         |             |              |       |   |                         |             |              |       |   |                         |             |              |
| <237           | 9  | 2.47(1.98-3.07), <0.001 | 48.5, 0.050 | 0.835, 0.944 |       | 1 | 2.53(1.49-4.28), NR     | NR          | NR           | 0.246 | 3 | 3.11(2.03-4.78), <0.001 | 0.0, 0.399  | 0.602, 0.499 |
| ≥237           | 6  | 2.21(1.73-2.82), <0.001 | 17.5, 0.300 | 0.851, 0.814 | 0.653 | 4 | 1.66(1.48-1.87), <0.001 | 47.4, 0.812 | 0.734, 0.432 |       | 2 | 1.06(0.53-2.14), 0.867  | 0.0, 0.320  | NR           |
| Cut-off value  |    |                         |             |              |       |   |                         |             |              |       |   |                         |             |              |

|                       |    |                         |             |              |       |       |                         |                         |              |              |       |       |    |                         |             |              |       |
|-----------------------|----|-------------------------|-------------|--------------|-------|-------|-------------------------|-------------------------|--------------|--------------|-------|-------|----|-------------------------|-------------|--------------|-------|
| 1-2 VS 0              | 7  | 2.49(1.95-3.18), <0.001 | 39.0, 0.132 | 0.293, 0.232 |       | 0.821 | 2                       | 1.48(1.25-1.77), <0.001 | 0.0, 0.801   | NR           |       | 0.169 | 1  | 4.92(2.12-11.64), NR    | NR          | NR           | 0.303 |
| 2 VS 0                | 8  | 2.24(1.80-2.78), <0.001 | 40.6, 0.108 | 0.805, 0.553 |       |       | 3                       | 1.89(1.62-2.22), <0.001 | 42.5, 0.829  | 1.000, 0.861 |       |       | 4  | 1.95(1.30-2.93), 0.001  | 47.5, 0.126 | 0.497, 0.866 |       |
| <b>Treatment</b>      |    |                         |             |              |       |       |                         |                         |              |              |       |       |    |                         |             |              |       |
| Surgery               | 8  | 2.16(1.73-2.70), <0.001 | 52.2, 0.041 | 0.621, 0.575 | Ref   |       | 5                       | 1.64(1.33-1.94), <0.001 | 45.5, 0.119  | 0.624, 0.905 |       |       | 2  | 1.06(0.53-2.14), 0.867  | 0.0, 0.320  | 0.317, NR    | Ref   |
| CRT                   | 2  | 2.81(1.37-5.76), 0.005  | 76.1, 0.041 | NR           | 0.449 | NR    | NR                      | NR                      | NR           | NR           | NR    |       | 1  | 2.53(1.49-4.28), NR     | NR          | NR           | 0.192 |
| Mixed                 | 5  | 2.42(1.73-3.73), <0.001 | 0.0, 0.786  | 0.624, 0.364 | 0.730 | NR    | NR                      | NR                      | NR           | NR           |       |       | 2  | 4.72(2.24-9.95), <0.001 | 0.0, 0.843  | NR           | 0.104 |
| <b>Pathology</b>      |    |                         |             |              |       |       |                         |                         |              |              |       |       |    |                         |             |              |       |
| SCC                   | 5  | 2.17(1.59-2.96), <0.001 | 40.6, 0.151 | 0.624, 0.620 | 0.706 | 5     | 1.64(1.33-1.94), <0.001 | 45.5, 0.119             | 0.624, 0.905 |              |       |       | 2  | 2.54(1.53-4.23), <0.001 | 0.0, 0.936  | NR           | 0.945 |
| Mixed                 | 8  | 2.65(2.12-3.31), <0.001 | 44.3, 0.083 | 0.621, 0.847 | 0.342 | NR    | NR                      | NR                      | NR           | NR           | NR    |       | 3  | 2.50(0.74-8.47), 0.141  | 78.1, 0.010 | 0.602, 0.680 |       |
| NR                    | 2  | 1.89(1.31-2.74), 0.001  | 0.0, 0.786  | NR           | Ref   | NR    | NR                      | NR                      | NR           | NR           |       |       | NR | NR                      | NR          | NR           |       |
| <b>Clinical stage</b> |    |                         |             |              |       |       |                         |                         |              |              |       |       |    |                         |             |              |       |
| 0-III                 | 4  | 2.16(1.63-2.85), <0.001 | 0.0, 0.511  | 0.174, 0.201 |       | 0.741 | 4                       | 1.66(1.48-1.87), <0.001 | 47.4, 0.812  | 0.734, 0.432 |       |       | NR | NR                      | NR          | NR           | NR    |
| 0-IV                  | 11 | 2.45(2.00-3.00), <0.001 | 47.9, 0.038 | 0.938, 0.933 |       |       | 1                       | 2.53(1.49-4.28), NR     | NR           | NR           | 0.246 |       | 5  | 2.44(1.28-4.67), 0.007  | 57.5, 0.052 | 1.000, 0.751 |       |
| <b>Follow-up</b>      |    |                         |             |              |       |       |                         |                         |              |              |       |       |    |                         |             |              |       |
| <40                   | 5  | 3.30(2.16-5.05), <0.001 | 16.0, 0.312 | 0.624, 0.701 | 0.027 | 1     | 1.63(1.16-2.29), NR     | NR                      | NR           | NR           | 0.567 |       | 2  | 4.72(2.24-9.95), <0.001 | 0.0, 0.843  | NR           | 0.104 |
| ≥40                   | 4  | 1.56(1.11-2.20), 0.011  | 21.0, 0.284 | 0.497, 0.860 | Ref   |       | 3                       | 1.73(1.53-1.97), <0.001 | 69.2, 0.889  | 1.000, 0.731 | 0.416 |       | 2  | 1.06(0.53-2.14), 0.867  | 0.0, 0.320  | 0.317, NR    | Ref   |
| NR                    | 6  | 2.51(2.04-3.08), <0.001 | 3.8, 0.392  | 0.851, 0.847 | 0.052 | 1     | 1.18(0.64-2.17), NR     | NR                      | NR           | NR           | Ref   |       | 1  | 2.53(1.49-4.28), NR     | NR          | NR           | 0.192 |
| <b>Age</b>            |    |                         |             |              |       |       |                         |                         |              |              |       |       |    |                         |             |              |       |
| <62.1                 | 5  | 2.15(1.66-2.78), <0.001 | 0.0, 0.490  | 0.050, 0.074 | 0.821 | 4     | 1.72(1.53-1.94), <0.001 | 54.6, 0.831             | 1.000, 0.720 |              |       |       | 1  | 2.75(0.37-20.31), NR    | NR          | NR           | 0.931 |
| ≥62.1                 | 8  | 2.46(1.65-3.68), <0.001 | 59.6, 0.015 | 0.805, 0.690 | 0.632 | NR    | NR                      | NR                      | NR           | NR           | 0.369 |       | 4  | 2.43(1.17-5.06), 0.017  | 68.0, 0.025 | 0.497, 0.781 |       |
| NR                    | 2  | 2.03(1.15-3.58), 0.014  | 0.0, 0.972  | 0.317, NR    | Ref   | 1     | 1.18(0.64-2.17), NR     | NR                      | NR           | NR           |       |       | NR | NR                      | NR          | NR           |       |
| <b>Sex ratio</b>      |    |                         |             |              |       |       |                         |                         |              |              |       |       |    |                         |             |              |       |
| <5.48                 | 8  | 2.51(1.70-3.70), <0.001 | 51.9, 0.042 | 0.322, 0.602 |       | 0.690 | 1                       | 1.63(1.16-2.29), NR     | NR           | NR           |       |       | 3  | 2.23(0.64-7.81), 0.211  | 76.3, 0.015 | 0.602, 0.826 | 0.724 |
| ≥5.48                 | 7  | 2.25(1.80-2.82), <0.001 | 17.0, 0.300 | 0.881, 0.572 |       |       | 4                       | 1.71(1.51-1.93), <0.001 | 62.3, 0.852  | 0.734, 0.954 | 0.893 |       | 2  | 2.66(1.62-4.37), <0.001 | 0.0, 0.560  | 0.317, NR    |       |
| <b>mGPS</b>           |    |                         |             |              |       |       |                         |                         |              |              |       |       |    |                         |             |              |       |
| Overall               | 14 | 1.69(1.49-1.92), <0.001 | 48.4, 0.022 | 0.702, 0.354 |       |       |                         |                         |              |              |       |       |    |                         |             |              |       |
| <b>Country</b>        |    |                         |             |              |       |       |                         |                         |              |              |       |       |    |                         |             |              |       |
| China                 | 8  | 1.90(1.47-2.46), <0.001 | 63.2, 0.008 | 0.083, 0.107 |       |       |                         |                         |              |              |       |       |    |                         |             |              | 0.370 |
| Non-China             | 6  | 1.52(1.12-2.06), 0.007  | 10.9, 0.346 | 0.348, 0.795 |       |       |                         |                         |              |              |       |       |    |                         |             |              |       |
| <b>Sample size</b>    |    |                         |             |              |       |       |                         |                         |              |              |       |       |    |                         |             |              |       |
| <212                  | 6  | 2.50(1.91-3.28), <0.001 | 0.0, 0.652  | 0.348, 0.249 |       |       |                         |                         |              |              |       |       |    |                         |             |              | 0.014 |
| ≥212                  | 8  | 1.52(1.31-1.75), <0.001 | 40.1, 0.111 | 0.805, 0.893 |       |       |                         |                         |              |              |       |       |    |                         |             |              |       |
| <b>Cut-off value</b>  |    |                         |             |              |       |       |                         |                         |              |              |       |       |    |                         |             |              |       |
| 1-2 VS 0              | 9  | 1.56(1.35-1.81), <0.001 | 4.7, 0.077  | 1.000, 0.736 |       |       |                         |                         |              |              |       |       |    |                         |             |              | 0.092 |
| 2 VS 0                | 5  | 2.23(1.70-2.92), <0.001 | 31.5, 0.212 | 0.624, 0.943 |       |       |                         |                         |              |              |       |       |    |                         |             |              |       |

|                |    |                         |             |              |     |       |
|----------------|----|-------------------------|-------------|--------------|-----|-------|
| Treatment      |    |                         |             |              |     |       |
| Surgery        | 8  | 1.40(1.17-1.68), <0.001 | 31.2, 0.179 | 0.805, 0.577 | Ref |       |
| RT             | 2  | 2.12(1.26-3.57), 0.005  | 73.3, 0.053 | NR           |     | 0.138 |
| Mixed          | 4  | 2.56(1.81-3.62), <0.001 | 0.0, 0.824  | 1.000, 0.888 |     | 0.030 |
| Pathology      |    |                         |             |              |     |       |
| SCC            | 11 | 1.88(1.48-2.40), <0.001 | 56.7, 0.010 | 0.815, 0.222 |     | 0.383 |
| AD             | 1  | 1.24(0.69-2.22), NR     | NR          | NR           |     | 0.932 |
| Mixed          | 1  | 1.17(0.53-2.60), NR     | NR          | NR           |     | Ref   |
| NR             | 1  | 1.82(1.17-2.83), NR     | NR          | NR           |     | 0.502 |
| Clinical stage |    |                         |             |              |     |       |
| 0-III          | 9  | 1.64(1.26-2.13), <0.001 | 50.9, 0.038 | 0.532, 0.227 |     | 0.314 |
| 0-IV           | 5  | 1.89(1.56-2.28), <0.001 | 38.7, 0.163 | 1.000, 0.475 |     |       |
| Follow-up      |    |                         |             |              |     |       |
| <39            | 4  | 1.56(1.28-1.91), <0.001 | 0.0, 0.533  | 0.497, 0.066 |     | Ref   |
| ≥39            | 6  | 1.64(1.18-2.26), 0.003  | 54.2, 0.053 | 0.188, 0.166 |     | 0.714 |
| NR             | 4  | 2.66(1.98-3.59), <0.001 | 0.0, 0.783  | 0.497, 0.550 |     | 0.026 |
| Age            |    |                         |             |              |     |       |
| <61.7          | 8  | 1.90(1.47-2.46), <0.001 | 63.2, 0.008 | 0.083, 0.107 |     | 0.370 |
| ≥61.7          | 6  | 1.52(1.12-2.06), 0.007  | 10.9, 0.346 | 0.348, 0.795 |     |       |
| Sex ratio      |    |                         |             |              |     |       |
| <4.91          | 7  | 1.77(1.32-2.38), <0.001 | 64.0, 0.011 | 0.652, 0.409 |     | 0.930 |
| ≥4.91          | 7  | 1.81(1.44-2.29), <0.001 | 25.4, 0.235 | 0.652, 0.680 |     |       |
| <b>CAR</b>     |    |                         |             |              |     |       |
| Overall        | 10 | 1.84(1.60-2.10), <0.001 | 41.8, 0.079 | 0.531, 0.809 |     |       |
| Country        |    |                         |             |              |     |       |
| China          | 5  | 1.90(1.50-2.41), <0.001 | 55.1, 0.063 | 1.000, 0.692 |     | 0.415 |
| Non-China      | 4  | 1.58(1.13-2.20), 0.008  | 40.9, 0.166 | 0.497, 0.377 |     | Ref   |
| NR             | 1  | 2.46(1.18-5.13), NR     | NR          | NR           |     | 0.360 |
| Sample size    |    |                         |             |              |     |       |
| <283           | 5  | 2.06(1.59-2.66), <0.001 | 0.0, 0.585  | 0.142, 0.143 |     | 0.396 |
| ≥283           | 4  | 1.71(1.26-2.31), 0.001  | 65.4, 0.021 | 0.174, 0.411 |     | Ref   |
| NR             | 1  | 2.46(1.18-5.13), NR     | NR          | NR           |     | 0.406 |
| Cut-off value  |    |                         |             |              |     |       |
| <0.13          | 4  | 1.63(1.35-1.96), <0.001 | 0.0, 0.443  | 0.174, 0.185 |     | 0.490 |
| ≥0.13          | 5  | 2.19(1.78-2.69), <0.001 | 43.2, 0.133 | 0.142, 0.271 |     | 0.230 |

|                |   |                         |             |              |       |
|----------------|---|-------------------------|-------------|--------------|-------|
| NR             | 1 | 1.15(0.56-2.70), NR     | NR          | NR           | Ref   |
| Treatment      |   |                         |             |              |       |
| Surgery        | 4 | 1.79(1.28-2.50), 0.001  | 62.4, 0.047 | 0.497, 0.432 | 0.963 |
| RT             | 1 | 2.46(1.18-5.13), NR     | NR          | NR           | 0.516 |
| Mixed          | 5 | 1.71(1.39-2.11), <0.001 | 36.8, 0.176 | 1.000, 0.632 | Ref   |
| Pathology      |   |                         |             |              |       |
| SCC            | 6 | 1.70(1.44-2.01), <0.001 | 21.2, 0.274 | 0.851, 0.586 | 0.535 |
| Mixed          | 2 | 1.38(0.63-3.03), 0.427  | 67.2, 0.081 | NR           | Ref   |
| NR             | 2 | 2.44(1.86-3.20), <0.001 | 0.0, 0.981  | NR           | 0.134 |
| Clinical stage |   |                         |             |              |       |
| 0-III          | 5 | 2.01(1.69-2.39), <0.001 | 33.5, 0.198 | 0.624, 0.603 | 0.230 |
| 0-IV           | 4 | 1.50(1.19-1.90), 0.001  | 39.4, 0.175 | 1.000, 0.791 | Ref   |
| NR             | 1 | 2.46(1.18-5.13), NR     | NR          | NR           | 0.332 |
| Follow-up      |   |                         |             |              |       |
| <40            | 2 | 1.53(1.25-1.89), <0.001 | 0.0, 0.390  | 0.317, NR    | Ref   |
| ≥40            | 2 | 1.56(0.58-4.16), 0.377  | 84.7, 0.010 | 0.317, NR    | 0.405 |
| NR             | 6 | 2.10(1.65-2.68), 0.001  | 0.0, 0.693  | 0.348, 0.261 | 0.213 |
| Age            |   |                         |             |              |       |
| <62.2          | 5 | 1.90(1.50-2.41), <0.001 | 55.1, 0.063 | 1.000, 0.692 | 0.415 |
| ≥62.2          | 4 | 1.58(1.13-2.20), 0.008  | 40.9, 0.166 | 0.497, 0.377 | Ref   |
| NR             | 1 | 2.46(1.18-5.13), NR     | NR          | NR           | 0.360 |
| Sex ratio      |   |                         |             |              |       |
| <5.5           | 4 | 1.53(1.26-1.85), <0.001 | 32.8, 0.216 | 0.497, 0.875 | Ref   |
| ≥5.5           | 5 | 2.21(1.81-2.70), <0.001 | 0.0, 0.471  | 0.014, 0.048 | 0.045 |
| NR             | 1 | 2.46(1.18-5.13), NR     | NR          | NR           | 0.285 |

Abbreviations: OS, overall survival; CSS, cancer-specific survival; DFS, disease-free survival; EC, esophageal carcinoma; NLR, neutrophil-to-lymphocyte ratio; PLR, platelet-to-lymphocyte ratio; LMR, lymphocyte-to-monocyte ratio; CAR, c-reactive protein-to-albumin ratio; SII, systemic inflammation index; PNI, prognostic nutritional index; GPS, Glasgow Prognostic Score; mGPS, modified Glasgow Prognostic Score; Ref, reference; P-reg, the P-value of meta regression; NR, not reported.
