# Supplementary material for: Inflammation and nutrition-based biomarkers in the prognosis of oesophageal cancer: a systematic review and meta-analysis
Source: HighWire-hosted journal article supplement (doi:10.1136/bmjopen-2020-048324), 2021-09-01
Supplement: bmjopen-2020-048324supp007_data_supplement.pdf [file bmjopen-2020-048324supp007_data_supplement.pdf]

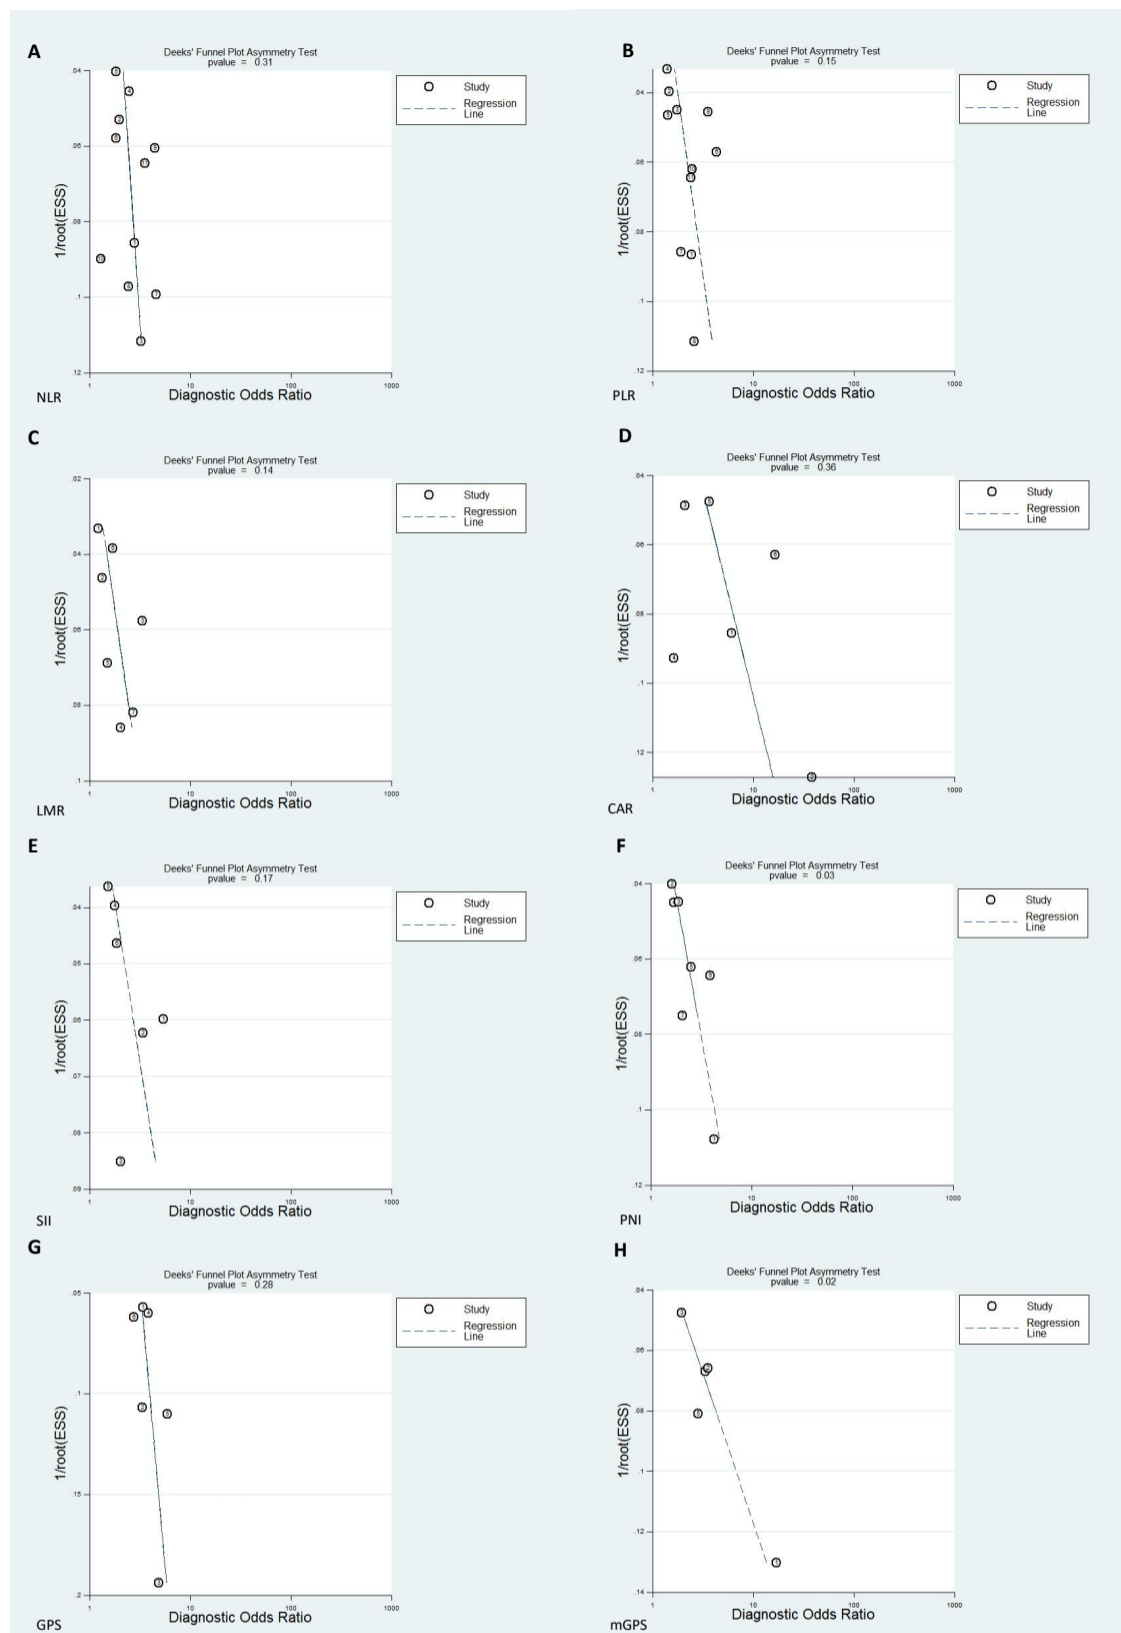

Figure 1. Deek's Funnel evaluating publication bias of DOR of 8 indicators. (A) NLR; (B) PLR; (C) LMR; (D) CAR; (E) SII; (F) PNI; (G) GPS; (H) mGPS.
